# Supplementary material for: Quantitative analysis of C. elegans transcripts by Nanopore direct-cDNA sequencing reveals terminal hairpins in non trans-spliced mRNAs
Source: PubMed Central journal article supplement (PMC9984361; doi:10.1038/s41467-023-36915-0), 2023-03-03
Supplement: 41467_2023_36915_MOESM1_ESM.pdf [file 41467_2023_36915_MOESM1_ESM.pdf]

# SUPPLEMENTARY FIGURES

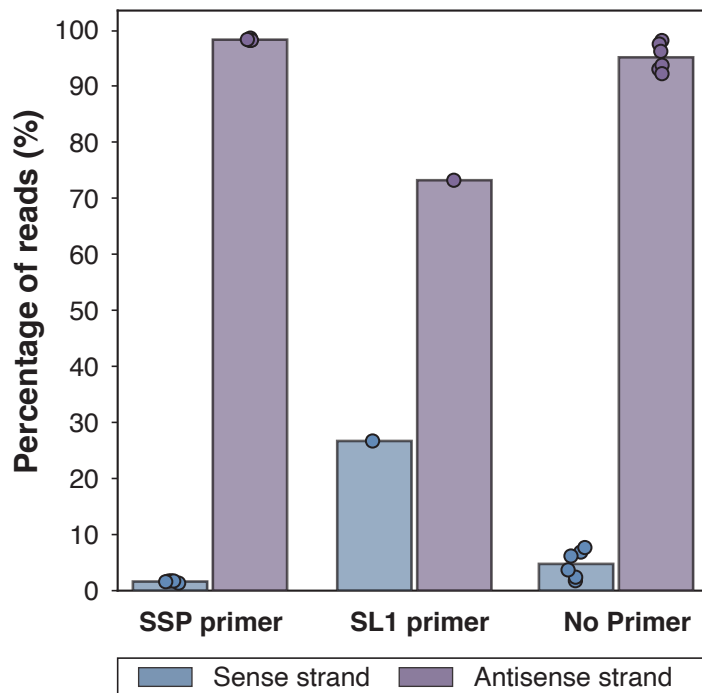

**Supplementary Fig. 1: Strand bias in ONT direct-cDNA experiments.** For each experiment, we measured the number of reads coming from each strand of the cDNA molecule sequenced. **SSP primer:** 2nd strand synthesis using the SSP primer (n=6). **SL1 primer:** 2nd strand synthesis using a SL1-specific primer (n=1). **No primer:** 2nd strand synthesis without using any primer (n=5).

**Supplementary Fig. 2: a Schematic representation of expected cDNA structure.** After ONT direct cDNA library preparation protocol double stranded cDNA is flanked by additional sequences that are expected to be recovered in the soft-clipped region of aligned reads. **b Measured length of 5' and 3' soft-clips.** Size distribution of observed soft-clips separated by read strands. 5' soft clip of antisense strand reads are in majority much larger than expected. **c Schematic representation of genomic read alignments obtained in *C. elegans* direct-cDNA experiments.** Purple region represent the region of a read mapped onto the genome. Soft-clip regions (in 5' and 3', per gene orientation) corresponds to unmapped part of the read.

**a**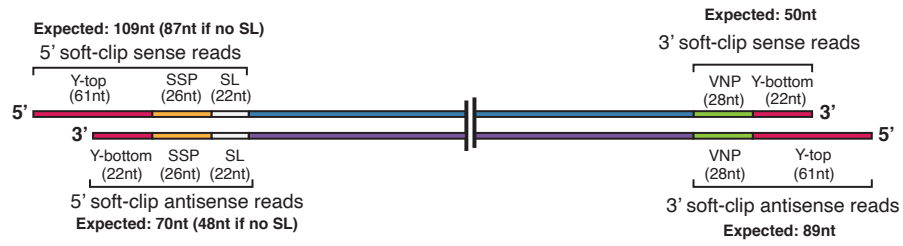**b**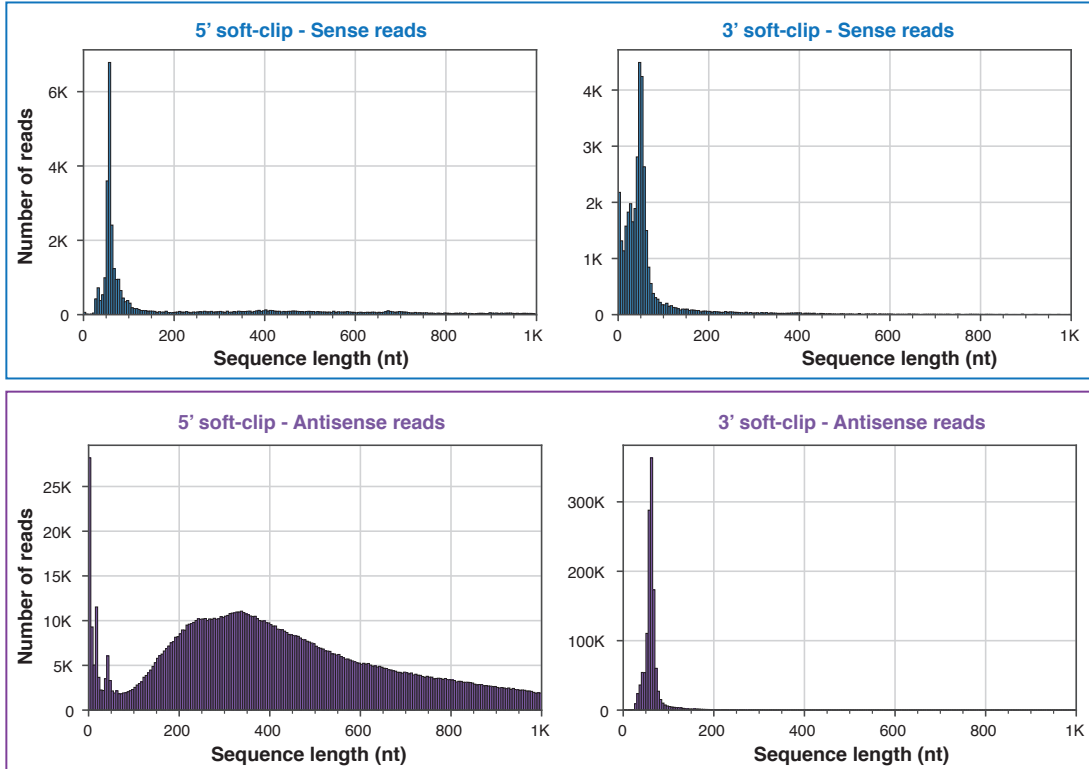**c**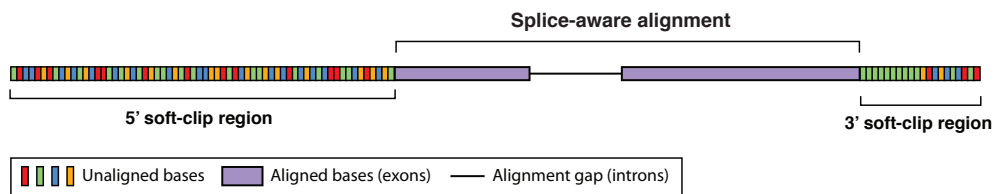



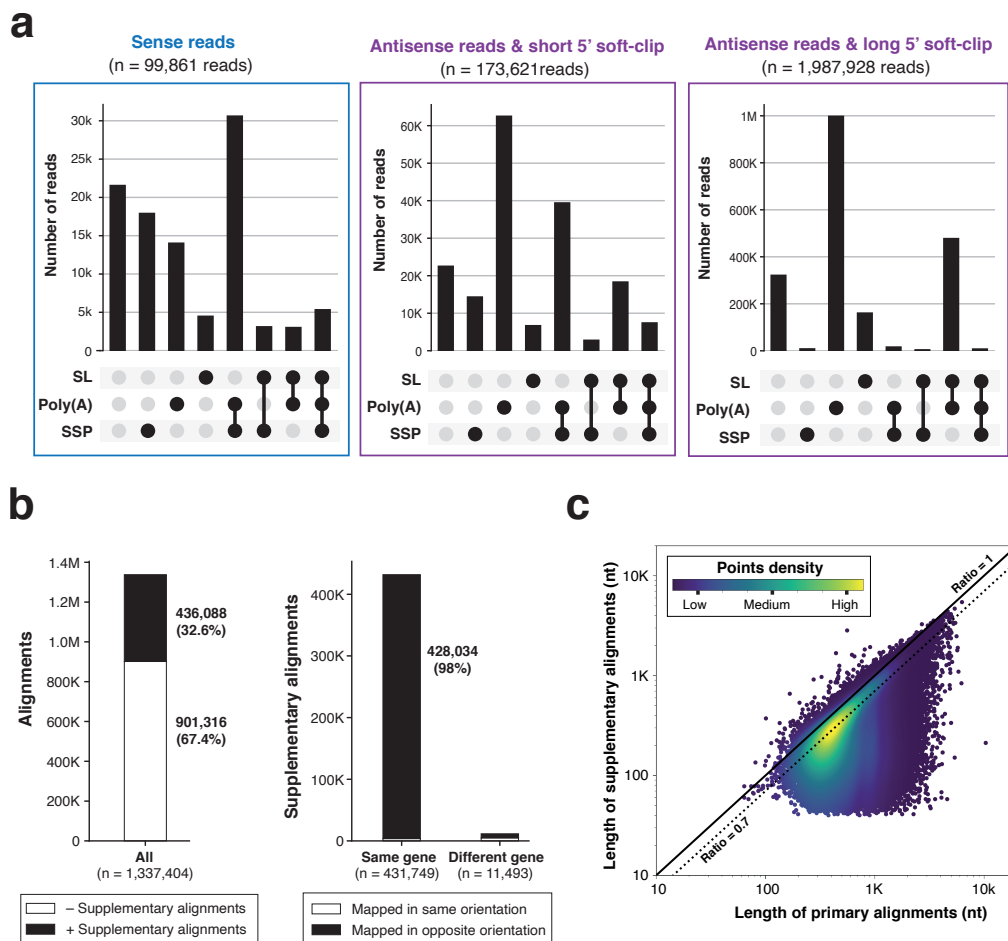

**Supplementary Fig. 3: a: Quantification of sequencing adapters in soft-clips regions.** For each read evaluated, we performed a sequence search for the SSP and SL motifs on the 5' soft-clip region, and for the poly(A) motif on the 3' soft-clip region **b: Origin of supplementary alignments.** 32.6% of aligned reads with with long 5' soft-clip have supplementary alignments. Among those, 98% are mapping to the same gene than the primary alignment, but in the opposite orientation. 32.6% of reads with primary alignments possess supplementary alignments. Among those, 98% are mapped to the same gene as in the primary alignment, but in the opposite orientation. **c: Size distribution of supplementary alignments.** Sizes of primary and supplementary alignments were compared for reads possessing both. Solid black line represent supplementary alignments that are the same size as their primary alignment (ratio 1/1). Dotted black line represent supplementary alignments that 70% of the size of their primary alignment (ratio 1/0.7).

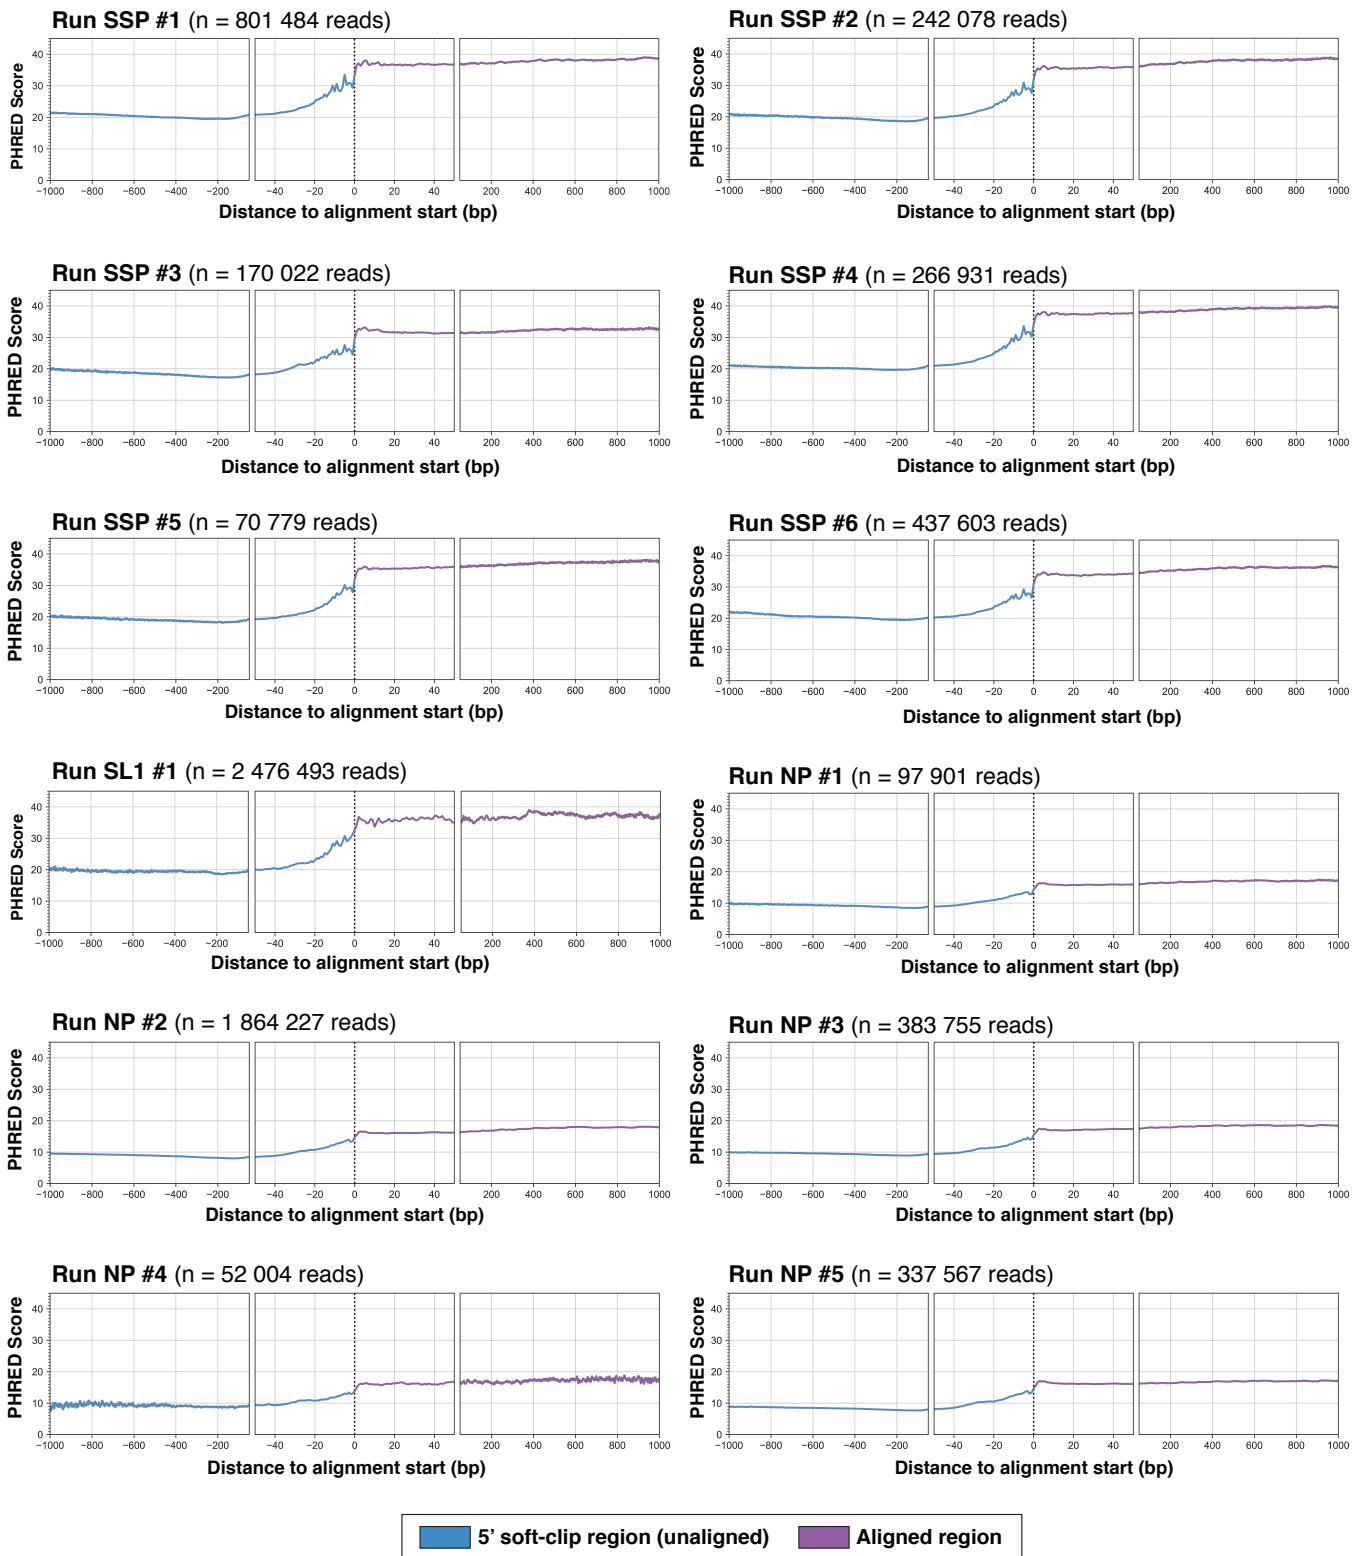

**Supplementary Fig. 4: Base quality measures in each experiment.** We measured the average base quality value over all the Nanopore reads obtained in each sequencing experiment. 5' soft-clip region is represented in blue and aligned region (primary alignment) is represented in purple.

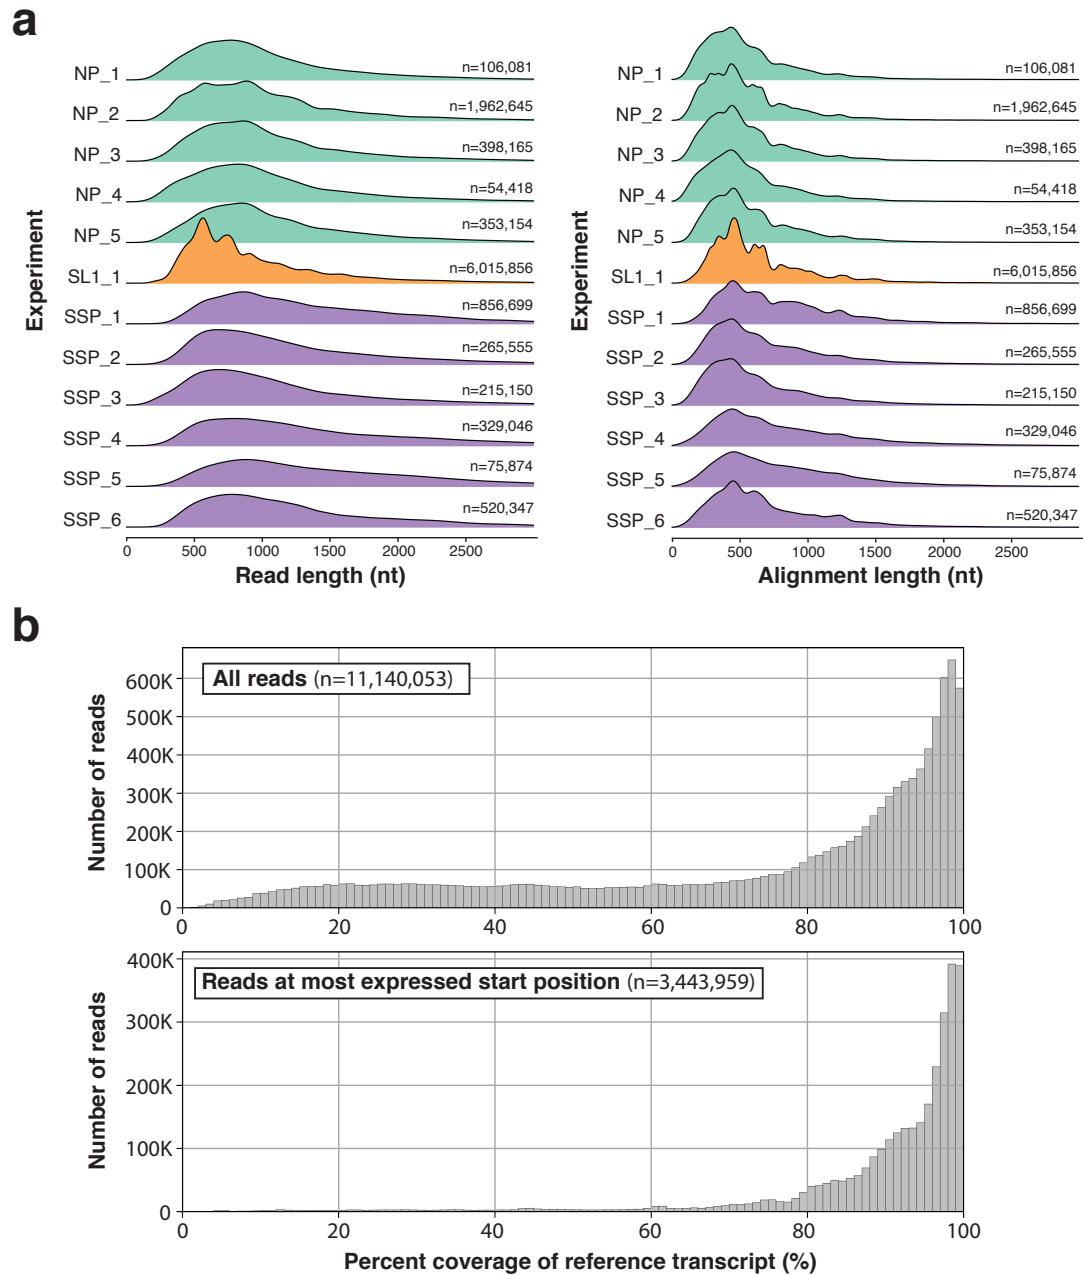

**Supplementary Fig. 5: a:** Read length and Alignment length are plotted as a histogram for each sequencing experiment and depicted as a joyplot. **b:** We measured their coverage of their respective reference transcript. The top Panel present the resulting distribution for all reads, the bottom one only for reads located at the most expressed position of each gene.

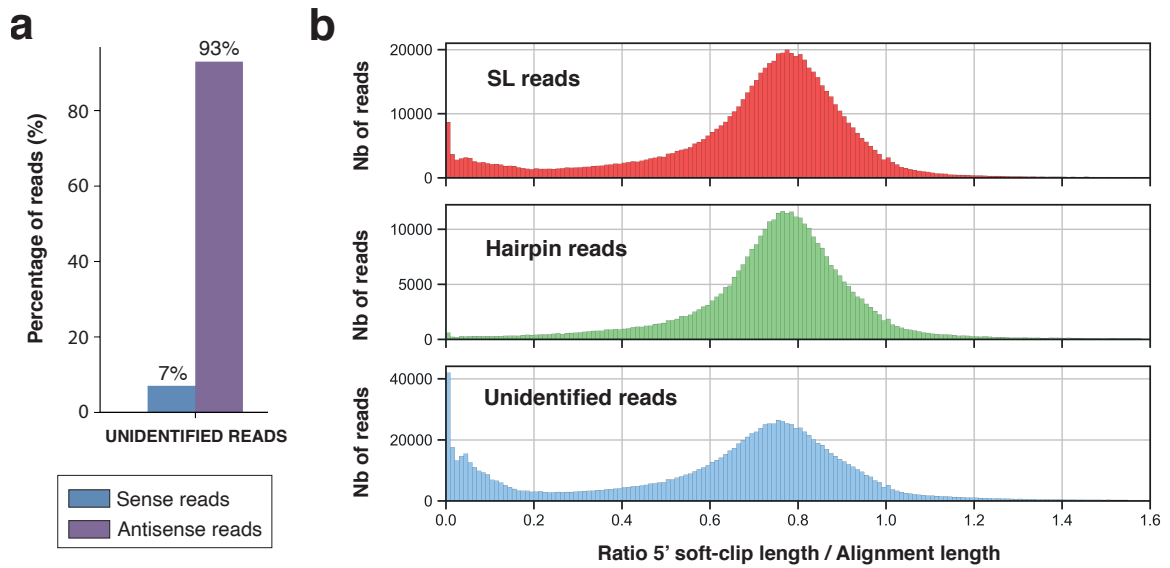

**Supplementary Fig. 6: a:** Strand orientation of reads for which we could not detect a SL sequence or an endogenous hairpin. **b:** Comparison of the length of 5' soft-clips versus the length of their alignment for reads considered SL (SL sequence found), Hairpin (Hairpin sequence found but no SL sequence) or unidentified (no SL or hairpin sequence found)

**a**

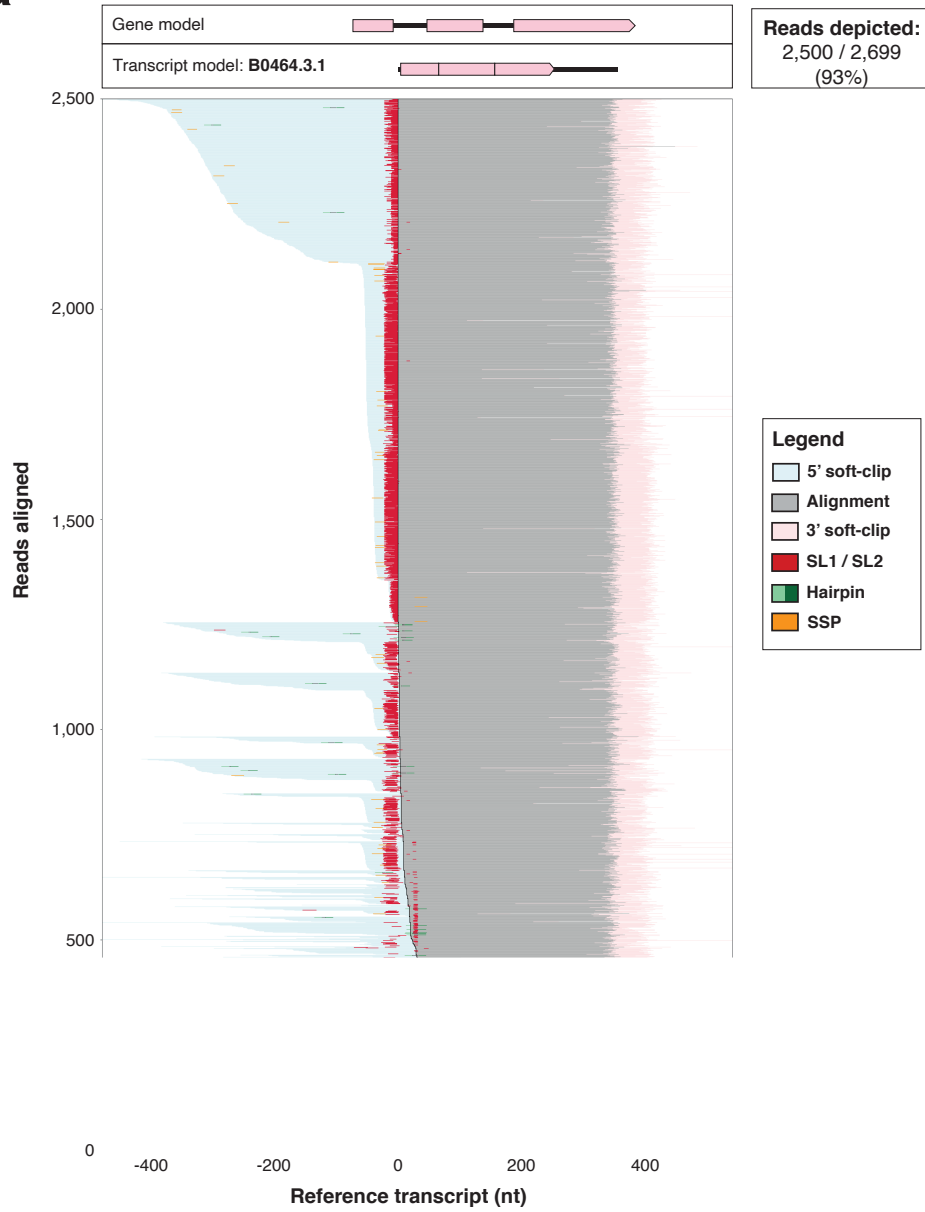

**Supplementary Fig. 7a:** Expanded representation of read features identified for each annotated gene isoform.

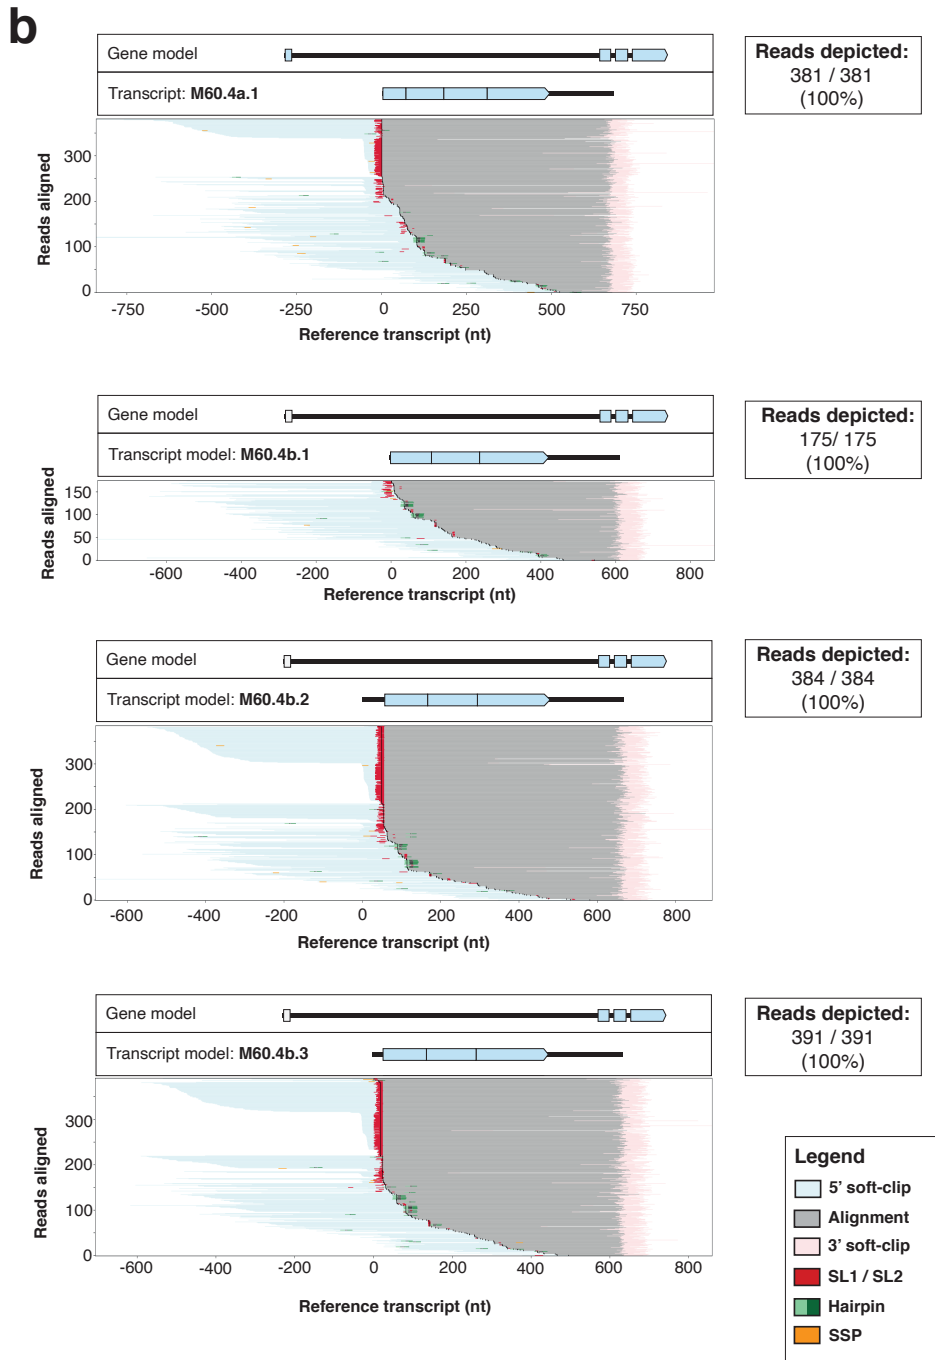

**Supplementary Fig. 7b:** Expanded representation of read features identified for each annotated gene isoform.

**C**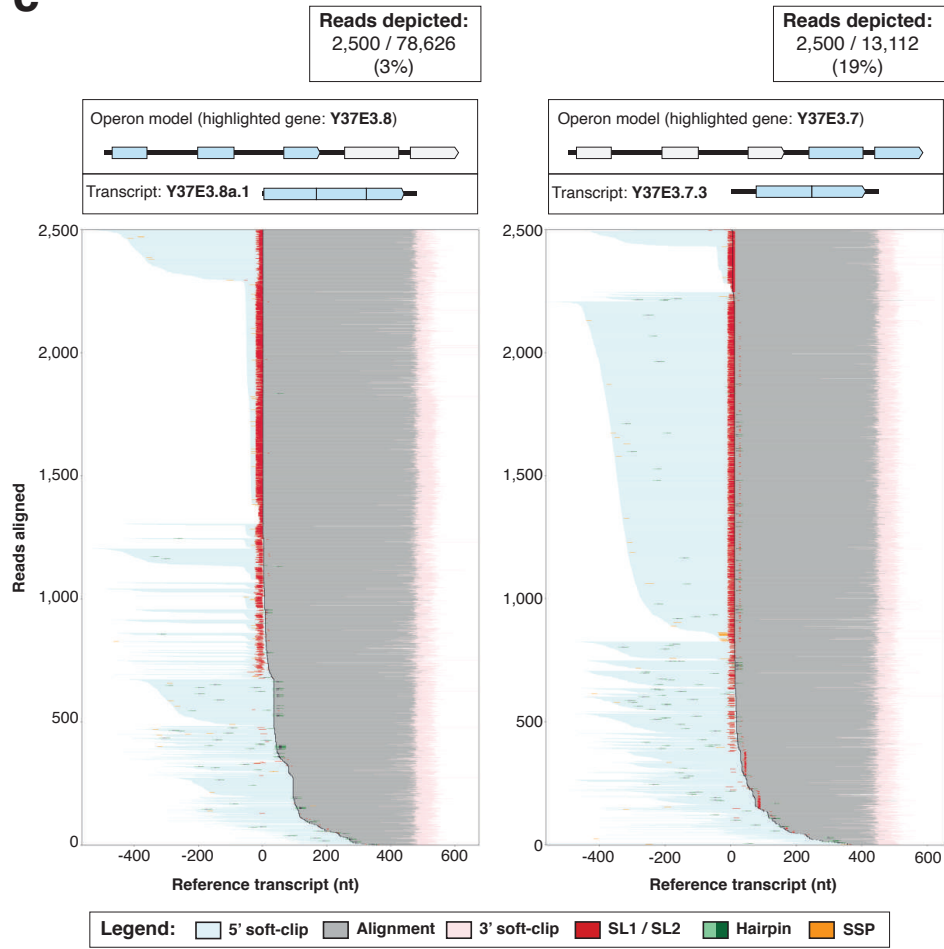

**Supplementary Fig. 7c:** Expanded representation of read features identified for each annotated gene isoform.

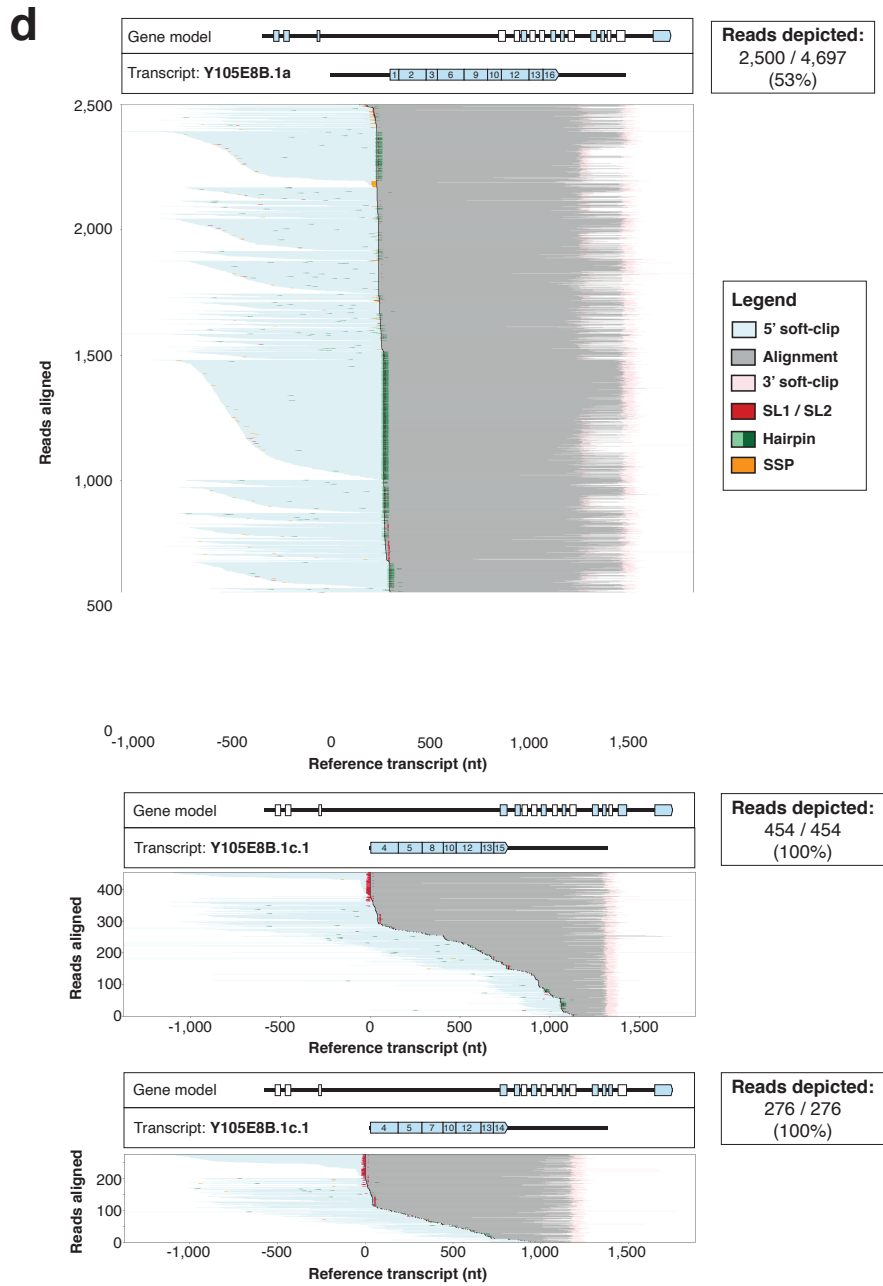

**Supplementary Fig. 7d:** Expanded representation of read features identified for each annotated gene isoform.



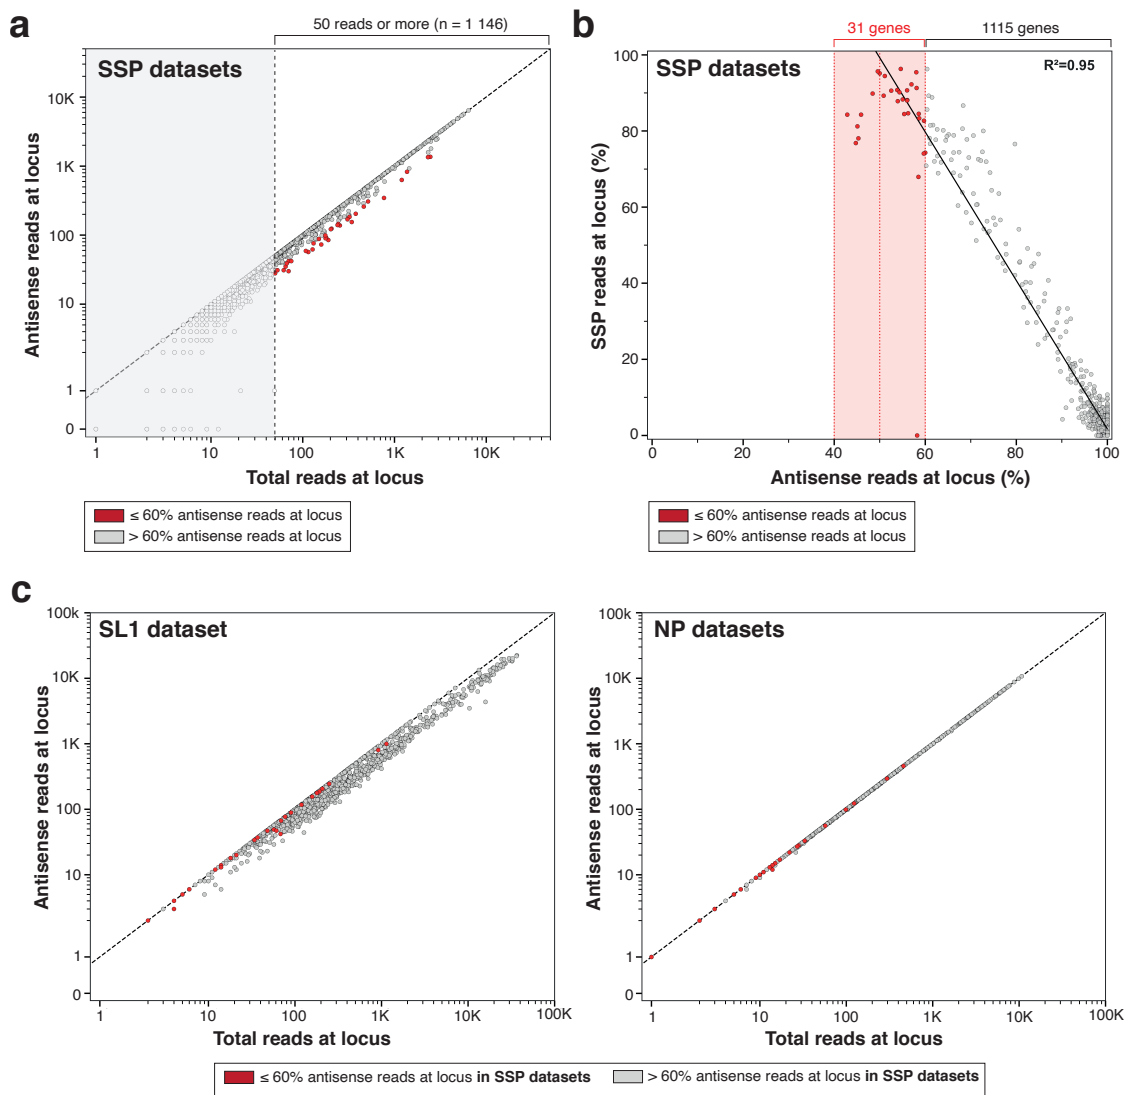

**Supplementary Fig. 8:** **a:** For each gene detected in the SSP dataset, we selected the most frequent 5' alignment start position and, if they had at least 50 reads, we plotted the number of antisense reads vs the total number of reads present at the position (n=1,146). The 31 genes displaying 60% or less antisense reads are highlighted in red. **b:** Linear regression analysis for the number of antisense reads (x-axis) and the percentage of reads for which we could detect the Strand Switching Primer (SSP) sequence (y-axis) in SSP datasets. **c:** For each locus, we plotted the total number of reads vs the number of antisense reads as shown in panel a considering only reads obtained in the SL1 dataset (left) and the NP datasets (right). As above, genes high proportion of antisense reads in the SSP datasets are shown in red.

Single Read  
Raw Base quality

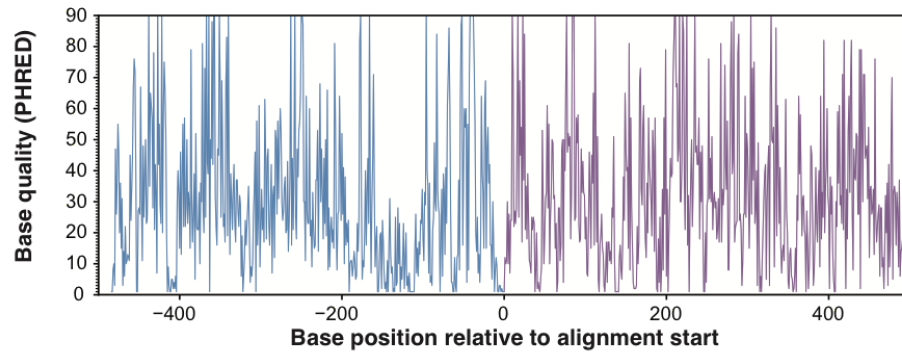

100 Reads  
Raw Base quality  
(superposed)

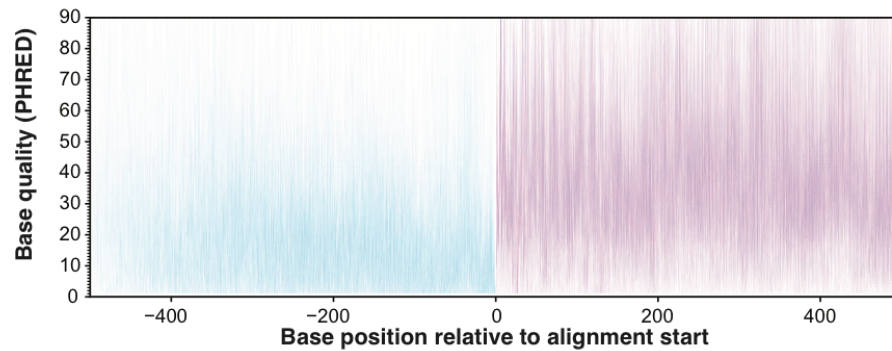

100 Reads  
Average Base quality

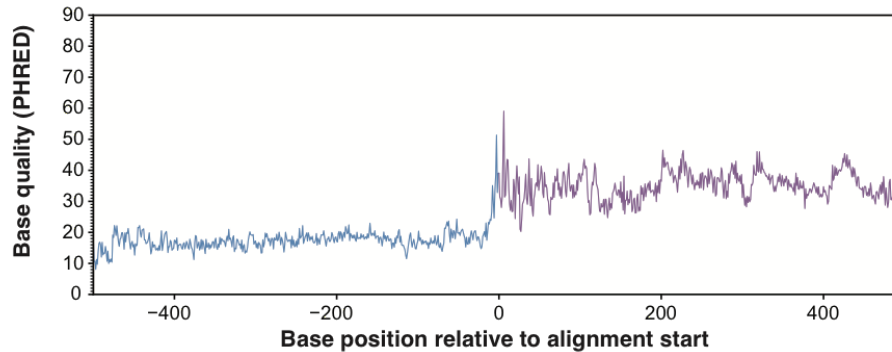

**Supplementary Fig. 9: Method for evaluating base quality.** Single read's base quality contains too much variability for accurate measurement (top panel). Trends in base quality can be observed when looking at larger samples of reads (middle panel - 100 reads shown together). Averaging the base quality per position across a large sample of reads (bottom panel) allows to accurately visualize differences in base quality between different regions of the reads. Unaligned 5' soft-clip region is shown in blue and alignment region in purple.

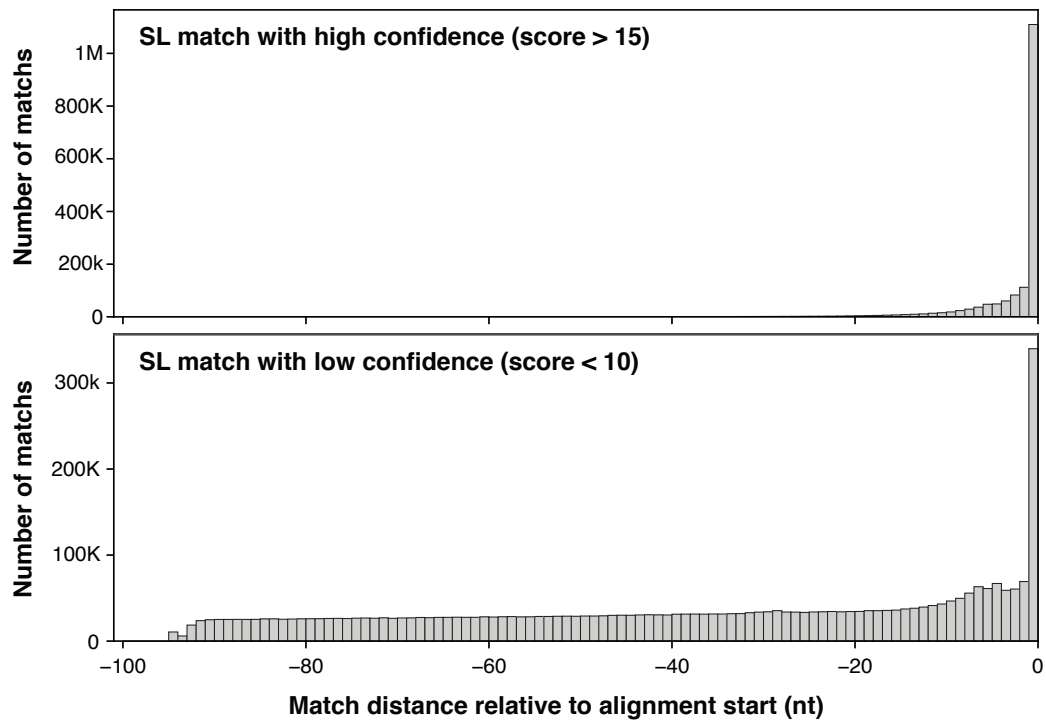

**Supplementary Fig. 10: High confidence SL matches are preferentially located near the alignment start.** For each SL sequence identified, we measured their distance to the alignment start. As expected, matches which scored high (top panel) are found in the direct vicinity of the alignment start. Low-scoring matches (bottom panel) are generally found all across the 5' soft-clip region, but a sub-set of those are found where expected, making those more reliable.

# TABLES

|       | Total Basecalled | mRNA      |        | rRNA      |        | other ncRNA |       | unmapped  |        |
|-------|------------------|-----------|--------|-----------|--------|-------------|-------|-----------|--------|
| SSP_1 | 1,067,006        | 856,699   | 80.29% | 26,155    | 2.45%  | 2,433       | 0.23% | 181,719   | 17.03% |
| SSP_2 | 372,176          | 265,555   | 71.35% | 24,802    | 6.66%  | 1,982       | 0.53% | 79,837    | 21.45% |
| SSP_3 | 473,394          | 215,150   | 45.45% | 31,680    | 6.69%  | 3,240       | 0.68% | 223,324   | 47.18% |
| SSP_4 | 804,456          | 329,046   | 40.90% | 164,953   | 20.50% | 3,348       | 0.42% | 307,109   | 38.18% |
| SSP_5 | 203,352          | 75,874    | 37.31% | 28,633    | 14.08% | 801         | 0.39% | 98,044    | 48.21% |
| SSP_6 | 2,698,210        | 520,347   | 19.28% | 1,346,202 | 49.89% | 17,779      | 0.66% | 813,882   | 30.16% |
| SL1_1 | 7,811,012        | 6,015,856 | 77.02% | 541,476   | 6.93%  | 32,440      | 0.42% | 1,221,240 | 15.63% |
| NP_1  | 330,271          | 106,081   | 32.12% | 32,045    | 9.70%  | 1,413       | 0.43% | 190,732   | 57.75% |
| NP_2  | 3,238,319        | 1,962,645 | 60.61% | 593,668   | 18.33% | 83,453      | 2.58% | 598,553   | 18.48% |
| NP_3  | 630,506          | 398,165   | 63.15% | 102,889   | 16.32% | 7,333       | 1.16% | 122,119   | 19.37% |
| NP_4  | 99,031           | 54,418    | 54.95% | 19,225    | 19.41% | 3,210       | 3.24% | 22,178    | 22.40% |
| NP_5  | 575,200          | 353,154   | 61.40% | 80,186    | 13.94% | 7,714       | 1.34% | 134,146   | 23.32% |

Supplementary Table 1: Alignment statistics by biotype.

**a**

|              | Basecalled        | PASS              |                  | FAIL             |                  |
|--------------|-------------------|-------------------|------------------|------------------|------------------|
|              |                   | Total             | Aligned          | Total            | Aligned          |
| SSP_1        | 1,067,062         | 956,806           | 828,136          | 110,200          | 28,563           |
| SSP_2        | 372,188           | 292,038           | 250,067          | 80,139           | 15,488           |
| SSP_3        | 428,451           | 238,915           | 188,634          | 189,479          | 26,516           |
| SSP_4        | 805,214           | 709,731           | 320,076          | 95,325           | 8,970            |
| SSP_5        | 203,384           | 166,521           | 72,555           | 36,831           | 3,319            |
| SSP_6        | 2,698,484         | 2,285,907         | 492,179          | 412,304          | 28,168           |
| SL1_1        | 7,811,076         | 6,701,520         | 5,748,355        | 1,109,492        | 267,501          |
| NP_1         | 330,272           | 219,458           | 78,430           | 110,813          | 27,651           |
| NP_2         | 3,238,319         | 1,942,290         | 1,357,598        | 1,296,029        | 605,047          |
| NP_3         | 630,506           | 430,424           | 325,555          | 200,082          | 72,610           |
| NP_4         | 99,031            | 60,990            | 42,368           | 38,041           | 12,050           |
| NP_5         | 575,203           | 287,458           | 213,590          | 287,742          | 139,564          |
| <b>Total</b> | <b>18,259,190</b> | <b>14,292,058</b> | <b>9,917,543</b> | <b>3,966,477</b> | <b>1,235,447</b> |

**b**

|      | Total     | SL        |     | Hairpin   |     | Unidentified |     |
|------|-----------|-----------|-----|-----------|-----|--------------|-----|
|      |           | Total     | %   | Total     | %   | Total        | %   |
| PASS | 9,915,859 | 4,864,725 | 49% | 1,122,274 | 11% | 3,928,860    | 40% |
| FAIL | 1,224,194 | 379,062   | 31% | 141,949   | 10% | 703,183      | 57% |

Supplementary Table 2: **a** : Pass/Fail status of reads included in the analysis. **b**: Distribution of 5' features identified in Pass/ Fail reads

| <b>Sequencing Exp.</b> | <b>BioSample</b> | <b>Genomic alignments</b> | <b>Transcriptomic alignments</b> |
|------------------------|------------------|---------------------------|----------------------------------|
| <b>SSP_1</b>           | SAMN27178168     | SRR18584063               | SRR18688508                      |
| <b>SSP_2</b>           |                  | SRR18584064               | SRR18688509                      |
| <b>SSP_3</b>           |                  | SRR18584067               | SRR18688512                      |
| <b>SSP_4</b>           |                  | SRR18584068               | SRR18688513                      |
| <b>SSP_5</b>           |                  | SRR18584069               | SRR18688514                      |
| <b>SSP_6</b>           |                  | SRR18584070               | SRR18688515                      |
| <b>SL1_1</b>           | SAMN27178169     | SRR18584059               | SRR18688504                      |
| <b>NP_1</b>            | SAMN27178170     | SRR18584060               | SRR18688505                      |
| <b>NP_2</b>            |                  | SRR18584061               | SRR18688506                      |
| <b>NP_3</b>            |                  | SRR18584062               | SRR18688507                      |
| <b>NP_4</b>            |                  | SRR18584065               | SRR18688510                      |
| <b>NP_5</b>            |                  | SRR18584066               | SRR18688511                      |

**Supplementary Table 3:** Sequence Read Archive (SRA) codes for accessing datasets.
